- 1 Combined pre-dialysis systolic blood pressure and pulse rate assessment for all-cause  
2 and cardiovascular mortalities: A nationwide cohort study on patients undergoing  
☒ haemodialysis  
☒
- ☒ Nobuhiko Joki, MD, PhD<sup>1, 2,#</sup>, Tatsunori Toida, MD, PhD<sup>3, 4,#</sup>, Kakuya Niihata, MD,  
☒ PhD<sup>4,#</sup>, Ryohei Inanaga, MD<sup>4, 5</sup>, Kenji Nakata, MD<sup>1</sup>, Masanori Abe, MD, PhD<sup>2, 6</sup>, Norio  
☒ Hanafusa, MD, PhD<sup>2, 7</sup>, Noriaki Kurita, MD, PhD, FACP<sup>4, 8, 9, \*</sup>  
☒
- ☒ <sup>1</sup>Division of Nephrology, Toho University Ohashi Medical Center, Tokyo, Japan
- 1☒ <sup>2</sup>The Committee of Renal Data Registry, the Japanese Society for Dialysis Therapy,  
11 Tokyo, Japan
- 12 <sup>3</sup>School of Pharmaceutical Sciences, Kyushu University of Health and Welfare,  
1☒ Miyazaki, Japan
- 1☒ <sup>4</sup>Department of Clinical Epidemiology, Graduate School of Medicine, Fukushima  
1☒ Medical University, Fukushima, Japan
- 1☒ <sup>5</sup>Department of Nephrology, Shin-Yurigaoka General Hospital, Kanagawa, Japan
- 1☒ <sup>6</sup>Divisions of Nephrology, Hypertension, and Endocrinology, Department of Internal  
1☒ Medicine, Nihon University School of Medicine, Tokyo, Japan
- 1☒ <sup>7</sup>Department of Blood Purification, Tokyo Women's Medical University, Tokyo, Japan
- 2☒ <sup>8</sup>Department of Innovative Research and Education for Clinicians and Trainees  
21 (DiRECT), Fukushima Medical University Hospital, Tokyo, Japan

1 <sup>9</sup>The Subcommittee of Statistical Analysis, The Committee of Renal Data Registry, The

2 Japanese Society for Dialysis Therapy, Tokyo, Japan

#N.J., T.T., and K.N. share the first authorship.

\***Corresponding author:** Professor Noriaki Kurita, MD, PhD, FACP

Department of Clinical Epidemiology, Graduate School of Medicine, Fukushima

Medical University

1 Hikarigaoka, Fukushima City, Fukushima 960-1295, Japan

Tel: +81-24-547-1470

1 Fax: +81-24-547-1468

11 E-mail: kuritanoriaki@gmail.com

12 ORCID: 0000-0003-4127-7500

1

1 **Abstract**

2 **Background and Aims**

☒ The prognostic utility of the combined assessment of pre-haemodialysis systolic blood  
☒ pressure (SBP) and pulse rate (PR) compared with their individual assessment is  
☒ unclear. This study aimed to determine whether the combined assessment could enhance  
☒ the prognostic utility in patients on haemodialysis.

☒ **Methods**

☒ This nationwide cohort study involved patients undergoing maintenance haemodialysis  
☒ using the Japanese Renal Data Registry database. Exposure was defined as a  
1☒ combination of SBP and PR. Forty-eight levels of exposure groups were created: SBP  
11 (six levels; <100, 100-<120, 120-<140, 140-<160 [reference], 160-<180, and ≥180  
12 mmHg) and PR (eight levels; <50, 50-<60, 60-<70 [reference], 70-<80, 80-<90, 90-  
1☒ <100, 100-<110, and ≥110 per minute). The primary and secondary outcomes were one-  
1☒ year all-cause and cardiovascular mortalities, respectively. Multivariate Cox  
1☒ proportional hazards models were used, and multiplicative interactions were assessed to  
1☒ determine the superiority of the combined model over the individual models. Additive  
1☒ interactions were assessed using relative excess risk due to interactions (RERI).

1☒ **Results**

1☒ The combined model explained mortality and cardiac mortality better than the  
2☒ individual SBP and PR models ( $P<0.001$  and  $P<0.002$ , respectively). A lower SBP was  
21 associated with a higher risk of all-cause mortality regardless of the PR. Most categories  
22 of lower SBP or higher PR vs. the 120-<140 mmHg and 70-<80/min category had  
2☒ positive RERIs. Similar findings were also observed for cardiac mortality.

1

2 **Conclusions**

The combined assessment of pre-dialysis SBP and PR may help in the simple  
 stratification of patients with excess risks that cannot be identified by individual SBP or  
 PR assessment.

**Keywords:** combined assessment, haemodialysis, pre-dialysis, pulse rate, systolic blood  
 pressure

## 1 Introduction

2 Pre-haemodialysis (HD) blood pressure (BP) and pulse rate (PR) are two basic  
3 physiological parameters routinely measured not only for safe and effective treatment,  
4 but also for the prediction of potential underlying cardiovascular complications and  
5 poor prognosis. A pre-HD systolic BP (SBP) of 130-160 mmHg is associated with a  
6 decrease in all-cause and cardiovascular mortalities,<sup>1-4</sup> and deviation of SBP from this  
7 range exhibits a U-shaped increase in the risks characteristic of HD. Few studies  
8 examining the predictive utility of pre-HD PR for mortality suggested a dose-response  
9 increase in one-year mortality risk associated with a higher PR (>60-70 / min).<sup>5-6</sup> Given  
10 that simultaneous changes in SBP and PR occur along with changes in myocardial  
11 oxygen demand and regulation of the autonomic nervous system, a combined  
12 assessment of SBP and PR could yield more accurate prognostic information.  
13 Nevertheless, very few such studies have been conducted in populations with chronic  
14 kidney disease (CKD).

15 A study on patients with non-dialysis CKD and hypertension demonstrated that  
16 a higher rate of pressure product (RPP), defined as the product of SBP and PR, was  
17 associated with an increased risk of major cardiovascular and cerebrovascular events  
18 and mortality, even after simultaneous adjustments for SBP and PR.<sup>7</sup> The associations  
19 between high RPP and increased long-term cardiovascular and all-cause mortalities  
20 have also been reported in the general population and in patients with coronary artery  
21 disease.<sup>8,9</sup> Given that RPP indicates myocardial workload and thus myocardial oxygen  
22 demand,<sup>7</sup> a rationale for examining the impact of high RPP on cardiovascular clinical  
23 outcomes can be readily concurred.<sup>10</sup> However, as the authors point out,<sup>7</sup> if SBP and PR  
24 change in opposite directions under physiological conditions, the RPP will remain

1 parallel,<sup>11</sup> and thus this may mask the possible adverse effects associated with  
2 alterations in the respective indices. Indeed, the predictability of short-term  
☒ cardiovascular disease or mortality risk due to a high shock index (SI), calculated by  
☒ dividing PR by SBP, has been shown in patients with coronary artery disease and  
☒ myocardial infarction, independent of SBP and PR.<sup>12,13</sup> Thus, although different  
☒ methods for evaluating the combination of SBP and PR are used in cases of high SBP  
☒ and high PR (i.e. high RPP) and low SBP and high PR (i.e. high SI), few studies have  
☒ considered both cases simultaneously. Patients undergoing maintenance dialysis who  
☒ often have left ventricular dysfunction or coronary artery disease are likely to have poor  
1☒ clinical outcomes.

11 Thus, to resolve this dilemma, we examined the combined effect of SBP and PR  
12 on all-cause and cardiovascular mortalities in patients on HD using data from the  
1☒ Japanese Renal Data Registry (JRDR), which encompasses nationwide dialysis centres  
1☒ in Japan. This epidemiologic approach allows quantification of the excess risk of the  
1☒ combined category of SBP and PR over the individual SBP and PR indices.<sup>14,15</sup>

1☒

1☒ Methods

1☒ *Study design and setting*

1☒ This nationwide cohort study used data from the JRDR database established by  
2☒ the Japanese Society for Dialysis Therapy (JSDT). The JRDR has accumulated data of  
21 patients on dialysis retrieved through annual surveys of all dialysis units in Japan  
22 conducted at the end of each year. The details of the JRDR have been published  
2☒ previously.<sup>16</sup> We used the JRDR data for 2019 as the baseline data and those for 2020 as

1 the follow-up data. The response rates in 2019 and 2020 were 98.3% and 98.8% on a  
2 facility basis, and 94.5% and 95.1% on a patient basis, respectively.<sup>17,18</sup>

### *Participants*

Patients on haemodialysis (including haemodiafiltration [HDF] and  
 haemofiltration) as of the end of 2019, aged  $\geq 20$  years were included in the study. The  
 exclusion criteria were as follows: (1) missing SBP and PR data, (2) implausible data  
 considered to be outliers or apparent errors (e.g. SBP  $< 70$  or  $> 260$  mmHg, diastolic  
 blood pressure  $< 30$  or  $> 150$  mmHg, pulse pressure  $< 15$  or  $\geq 150$  mmHg, PR  $< 30$  or  
  $> 180$  per minute, height  $< 120$  or  $\geq 200$  cm, body weight  $< 20$  or  $\geq 200$  kg, body weight  
1   $< 25$  kg, body mass index [BMI]  $< 10$  or  $> 50$  kg/m<sup>2</sup>, ultrafiltration [possibility of infusion  
11 during dialysis]  $< -1.0$  kg, haemoglobin  $< 6.0$  g/dL, and C-reactive protein level  $> 50$   
12 mg/dL), and (3) withdrawal from dialysis during follow-up.

### 1 *Exposures*

1  Exposure was defined as a combination of pre-HD SBP and PR, both of which  
1  are components of the RPP or SI. In this study, we decided to examine the effects of  
1  combinations of SBP and PR categories, because we expected the effects of high SBP  
1  and low PR to differ from those of low SBP and high PR, even if they had the same  
1  RPP. SBP was categorized into the following six levels:  $< 100$ ,  $100- < 120$ ,  $120- < 140$ ,  
1   $140- < 160$ ,  $160- < 180$ , and  $\geq 180$  mmHg. PR was categorized into the following eight  
2  levels:  $< 50$ ,  $50- < 60$ ,  $60- < 70$ ,  $70- < 80$ ,  $80- < 90$ ,  $90- < 100$ ,  $100- < 110$ , and  $\geq 110$  per minute.  
21 A total of 48 levels were created based on the  $6 \times 8$  categories. For this study,  $140- < 160$   
22 mmHg and  $60- < 70$  /min was used as the reference category.

## 1 *Outcomes*

2           The primary outcome was all-cause mortality during the one-year follow-up  
3 ☒ period, and the secondary outcome was mortality due to heart disease during the same  
4 ☒ period. Heart diseases included heart failure, pulmonary oedema, ischaemic heart  
5 ☒ disease (IHD), arrhythmia, valvular heart disease, other heart diseases, hyperkalaemia,  
6 ☒ and sudden death. The causes of death were diagnosed and reported by the on-site  
7 ☒ physicians based on the patients' medical records. The follow-up period started on 31  
8 ☒ December 2019 and ended on events involving death or kidney transplantation, or on 31  
9 ☒ December 2020 whichever occurred first. We collected data on the month of death and  
10 ☒ causes of death from the JRDR database in 2020. Because the JRDR only records the  
11 month of death, withdrawal of dialysis, and kidney transplantation without specific days,  
12 we assumed that each event occurred on the 15th day of the month for our  
13 ☒ estimations.<sup>19,20</sup>

## 14 ☒ *Covariates*

15 ☒           Covariates were defined as variables considered to be determinants of SBP, PR,  
16 ☒ and mortality, and were identified based on evidence from the literature and clinical  
17 ☒ expertise through discussion among the investigators (NJ, KN, TT, KN, and NK). We  
18 ☒ selected minimally sufficient covariates to estimate the total effects of exposure using  
19 ☒ the established analysis rule with the DAGitty web application ([www.dagitty.net](http://www.dagitty.net)),<sup>21,22</sup>  
20 ☒ based on the directed acyclic graph model (Supplementary Figure 1). The following  
21 variables were selected as covariates: age; sex; diastolic blood pressure; interdialytic  
22 weight gain (IDWG) calculated as pre-dialysis body weight minus post-dialysis body  
23 ☒ weight; BMI; serum C-reactive protein levels; haemoglobin levels; atrial fibrillation



1 (AF); use of antihypertensive drugs; smoking; diabetes; and history of IHD, cerebral  
2 haemorrhage, and cerebral infarction.

### *Statistical analysis*

For descriptive statistics, continuous variables are summarised as medians  
 (interquartile ranges), and categorical variables are summarised as frequencies and  
 percentages. To examine the impact of exposure on the outcomes, we used Cox  
 proportional hazards models that included the aforementioned covariates. Our interest  
 was whether the combination of SBP and PR could explain the impact on outcomes  
 better than the individual SBP and PR categories. This is mathematically equivalent to  
1  examining whether the addition of 35 interaction terms from the (6-1)×(8-1) categories  
11 to the respective categories of SBP and PR is statistically significant (i.e. evaluating  
12 multiplicative interactions). Therefore, we created two separate models, one including  
1  SBP and PR categories and interaction terms and the other including SBP and PR  
1  categories, and compared the models with and without interaction terms using the Wald  
1  test.<sup>23</sup> This analysis was performed for both primary and secondary outcomes.  
1  Furthermore, to evaluate the potential additive interaction between SBP and PR, we  
1  calculated the relative excess risk due to interaction (RERI) in the models, including  
1  exposures and covariates.<sup>14,15,24</sup> For semiquantitative visualisation of the relationships  
1  between the three factors of pre-HD SBP and PR and the outcomes, heatmaps were  
2  overlaid on tables for the hazard ratios (HRs) and RERIs by the SBP and PR  
21 combinations.<sup>25</sup> The sequential scheme “YlOrRed” colour palette was used for the HRs  
22 heatmaps, and the divergent scheme “RdBu” colour palette was used for the RERIs  
2  heatmaps.<sup>26</sup> Missing values were imputed using a multiple imputation method, creating  
2  20 datasets using conditional chained equations, and combining them according to

- 1 Rubin's rule.<sup>27</sup> All analyses were performed using Stata/SE version 18 software (Stata
- 2 LP, College Station, TX, USA).

*Ethics statement*

The data used in this study do not contain any personally identifiable  
 information. The present study was conducted following Japan's privacy protection  
 laws and ethical guidelines for epidemiological studies published by the Ministry of  
 Education, Science, and Culture, Ministry of Health, Labor, and Welfare, and the  
 STROBE guidelines. The study protocol was approved by the Medicine Ethics  
 Committee of the JSDT (No.60) and conducted in accordance with the Declaration of  
1 Helsinki. The requirement for written informed consent was waived due to the  
11 retrospective nature of this study.

12 **Results**

1 *Patient characteristics*

1 A total of 321,077 patients, aged  $\geq 20$  years undergoing HD or HDF were  
1 identified. Of these, 45,418 patients with missing or implausible BP or PR values were  
1 excluded and 275,659 patients were enrolled at the end of 2019. Furthermore, 444  
1 patients were excluded owing to missing follow-up data at the end of 2020. Finally,  
1 275,215 patients were included in the analysis.

1 The patient characteristics are presented in Tables 1 and 2. In particular, patients  
2 in the SBP  $< 100$  mmHg category had a higher median age and CRP level, longer  
21 dialysis duration, lower median BMI, and an increased incidence of AF and IHD (Table

1 1). However, the PR  $\geq 100$  / min category had lower median age, higher median CRP,  
2 and an increased incidence of diabetes, AF, and IHD (Table 2).

*Association of combined pre-HD SBP and PR with all-cause mortality*

During 263,016 person-years of follow-up, 24,623 deaths were observed, with  
 an incidence rate of 9.4 per 100 person-years. Descriptive statistics for all-cause  
 mortality by the combined category of pre-HD SBP and PR are presented  
 (Supplementary Table 1). The model for the combined SBP and PR category explained  
 mortality better than the model that included the SBP and PR categories separately ( $P$   
 for interaction by the Wald test  $<0.001$ ). The combined effects of SBP and PR on  
1  mortality in terms of HRs and RERI are shown in Figure 1. In subgroups with a PR of  
11 60- $<70$  / min or lower, the increased HR of risk by SBP category was U-shaped (Figure  
12 1A). Regardless of the PR subgroup, the association between low SBP and high all-  
1  cause mortality risk was consistent. A monotonic increase in HR with increasing PR  
1  was observed mainly in the subgroups with an SBP of 140- $<160$  mmHg or lower. In the  
1  subgroup with SBP  $>180$  mmHg, the increased HR of risk by the PR category was U-  
1  shaped.

1  In addition, evidence of effect modification by additive scales was observed  
1  (Figure 1B). In particular, most categories with a lower pre-HD SBP or higher PR than  
1  the 120- $<140$  mmHg and 70- $<80$ /min categories, respectively showed positive RERIs.  
2  For example, the strongest positive RERI was found in the SBP  $<100$  mmHg and PR  
21  $\geq 110$  / min category (RERI=2.00, 95% confidence interval [CI] 0.43-3.57). Conversely,  
22 many categories with a higher pre-HD SBP or PR than the 160- $<180$  mmHg and 70-  
2   $<80$ /min categories showed negative RERIs.

2

1 *Association of combined pre-HD SBP and PR with cardiac mortality*

2 During the same follow-up, 7,056 cardiac mortalities were observed with an  
3 incidence rate of 2.7 per 100 person-years. Descriptive statistics for cardiac mortality by  
4 the combined category of pre-HD SBP and PR are presented (Supplementary Table 2).  
5 The model for the combined SBP and PR categories explained cardiac mortality better  
6 than the model that included the SBP and PR categories separately (*P* for interaction by  
7 the Wald test: 0.002). The combined effects of SBP and PR on cardiac mortality in  
8 terms of HRs and RERI are shown in Figure 2. Similar to all-cause mortality, the  
9 increased HR by SBP category was U-shaped in subgroups with PRs of 60-<70/min or  
10 lower (Figure 2A). Regardless of the PR subgroup, the association between low SBP  
11 and high cardiac mortality risk was consistent. A monotonic increase in HR with  
12 increasing PR was mainly observed in subgroups with an SBP of 140-<160 mmHg or  
13 lower. In the subgroup with an SBP of 160-<180 mmHg or higher, the increased HR of  
14 risk by the PR category was U-shaped.

15 In addition, evidence of effect modification by additive scales was observed  
16 (Figure 2B). In particular, most categories with a lower pre-HD SBP or higher PR than  
17 the 120-<140 mmHg and 80-<90/min categories had positive RERIs. Conversely, many  
18 categories with a higher pre-HD SBP or PR than the 160-<180 mmHg and 70-<80/min  
19 categories showed negative RERIs, although they were not statistically significant.

20 **Discussion**

21 Using data from a nationwide registry of Japanese patients undergoing  
22 maintenance HD, we found that the combined category of SBP and PR explained the  
23 one-year risk of all-cause and cardiovascular mortalities better than the separate

1 categories of pre-dialysis SBP and PR. For the HR for all-cause mortality, compared  
2 with the reference range of pre-dialysis SBP and PR (140-160 mmHg and 60-70 bpm,  
☒ respectively), either an increase or decrease in SBP alone (i.e. a U-shaped relationship)  
☒ and an increase in PR alone were associated with an increased risk; however, the  
☒ combination of lower SBP and higher PR demonstrated a greater risk than lower SBP or  
☒ higher PR alone. This was also supported by the presence of many low SBP and high  
☒ PR categories showing positive RERI. Similarly, for the HR for cardiovascular  
☒ mortality, compared with the pre-dialysis reference range for SBP and PR, an increase  
☒ or decrease in SBP alone (i.e. a U-shaped relationship) and an increase in PR alone were  
1☒ associated with an increased risk; however, the combination of low SBP and high PR  
11 showed a greater risk compared with low SBP or high PR alone. This was supported by  
12 the presence of several low SBP and high PR categories showing positive RERI.

1☒ The findings from our study partially concur with those of previous studies on  
1☒ the relationship between pre-dialysis SBP or PR and prognosis among patients  
1☒ undergoing HD and provide a new interpretation by combining the two indices. For all-  
1☒ cause and cardiovascular mortalities, a U-shaped increase in HR by SBP category was  
1☒ observed mainly in the subgroup with a PR of 60-<70/min or less. The SBP categories  
1☒ with particularly low risk in these subgroups ranged from 120 to 160 mmHg, consistent  
1☒ with the observed pre-dialysis SBP range of 130-160 mmHg associated with the lowest  
2☒ risk among the total participants in the previous cohort studies.<sup>1,2,4,28</sup> The elevated pre-  
21 HD SBP may reflect both arterial stiffness and IDWG.<sup>29</sup> Increased cardiac preload and  
22 afterload, through the combination of arterial stiffness and the Frank-Starling  
2☒ mechanism associated with elevated ventricular volume,<sup>30</sup> increases myocardial oxygen  
2☒ demand, thereby precipitating the development of cardiovascular events.<sup>29</sup> However,

1 because we adjusted for weight gain and history of cardiovascular diseases, the  
2 increased risks associated with higher pre-HD SBP may reflect structural changes, such  
☒ as endothelial dysfunction and hypertensive cardiomyopathy, which were not captured  
☒ by the adjusted variables.

☒ The observed relationships between low pre-HD SBP and high risks of all-cause  
☒ and cardiovascular mortalities, regardless of the PR category, are supported by previous  
☒ studies.<sup>4,31</sup> The underlying pathophysiology of chronic hypotension among patients on  
☒ dialysis may be well defined in some cases,<sup>32</sup> but remains poorly understood.<sup>33</sup>

☒ Cardiac disease with severely reduced left ventricular ejection fraction and  
1☒ valvular heart disease may also occur.<sup>32</sup> Pathophysiological mechanisms such as  
11 autonomic dysregulation and excess activity of vasodilatory mediators have also been  
12 noted.<sup>32,33</sup> For example, nitric oxide, a strong vasodilator, is increased in uraemia, and  
1☒ plasma levels of nitrites are positively correlated with years of dialysis.<sup>32</sup> Long-term  
1☒ (usually 5 years) haemodialysis is common in chronic hypotension.<sup>32</sup> While our study  
1☒ did not capture the abovementioned structural heart diseases, the excess activity of  
1☒ vasodilatory mediators may be involved in this population, as the group with an SBP  
1☒ <100 mmHg had a particularly long history of dialysis (median 7.0 years).

1☒ The monotonic increase in HR by an increasing PR category was observed  
1☒ mainly in the subgroup with an SBP of 140-<160 mmHg or less. The cause of  
2☒ tachycardia in patients undergoing HD may be multifactorial, including prodromal  
21 congestive heart failure and sympathetic nervous system activation.<sup>6</sup> Indeed, the  
22 category with the highest PR of  $\geq 110$ /min was characterised by baseline characteristics  
2☒ consistent with congestive heart failure: high prevalence of diabetes mellitus, AF, and  
2☒ IHD. However, this may reflect unmeasured tachyarrhythmic diseases or heart failure

1 with low cardiac output because we adjusted for the characteristics mentioned above. In  
2 contrast, especially for cardiovascular mortality, a U-shaped increase in HR by PR  
☒ category was observed mainly in the subgroup with an SBP of 160-<180 mmHg or  
☒ higher. Bradycardia may reflect medications with negative chronotropic effects, cardiac  
☒ disease with damage to the conduction system (e.g. narrowing of the right coronary  
☒ artery), or electrolyte imbalance. However, because prescribing  $\beta$ -blockers to patients  
☒ on HD may be associated with a favourable prognosis,<sup>34</sup> underlying pathologies  
☒ requiring its prescription may be the culprit for the poor prognosis associated with  
☒ bradycardia.

1☒ A novel finding of this study was that the combined pre-HD SBP and PR  
11 category explained the risks of all-cause and cardiovascular mortalities better than the  
12 pre-HD SBP or PR categories alone. In particular, most categories with lower pre-HD  
1☒ SBP or higher PR than the 120-<140 mmHg and 70-<80/min categories showed  
1☒ positive RERIs, indicating that the combined pre-HD SBP and PR category accounted  
1☒ for more patients with excess risks than the single categories. In addition, this subset  
1☒ includes combined categories corresponding to an SI >0.7, which showed poor  
1☒ prognosis among patients with myocardial infarction,<sup>12</sup> that is, those with an SBP <100  
1☒ mmHg and 70-<80/min or higher PR, or those with an SBP of 100-<120 mmHg and 90-  
1☒ <100/min or higher PR. The underlying pathologies explaining these categories may  
2☒ include the aforementioned cardiac diseases with low cardiac output, excess activity of  
21 vasodilatory mediators, decreased extracellular fluid volume, and malnutrition.<sup>6,32</sup>  
22 Indeed, the population with an SBP <100 mmHg was characterised by a relatively low  
2☒ BMI, high CRP level, and increased IHD, which is seen in the complex of protein-

1 energy wasting, inflammation, and cardiovascular disease associated with unfavourable  
2 prognosis.<sup>35</sup>

☒ In contrast, many categories with a higher pre-HD SBP or PR than the 160-<180  
☒ mmHg and 70-<80/min categories showed negative RERIs. These categories  
☒ corresponded to high RPP categories; however, we were unable to verify the increased  
☒ mortality risk associated with high RPP observed in non-dialysis CKD.<sup>7</sup> However, the  
☒ exact reason for this remains unclear. Although speculative, this may indicate the  
☒ robustness of the cardiac system with functioning compensatory mechanisms; for  
☒ example, a concomitant increase in SBP and a parallel increase in PR with increasing  
1☒ fluid volume.

11 Finally, positive, although not statistically significant, RERI in the  $\geq 180$  mmHg  
12 and  $< 50$  / min category indicates the presence of a high-risk subgroup that cannot be  
1☒ characterised by a high SI or RPP.

1☒ This study has several implications for dialysis providers and policymakers.  
1☒ First, the identification of subsets with high RERIs through the simultaneous assessment  
1☒ of pre-HD SBP and PR will help the limited healthcare staff within dialysis facilities to  
1☒ focus care and interventions on patients with an excess risk of cardiac or all-cause  
1☒ mortality.<sup>36</sup> For example, targeted care can be designed, such as screening for cardiac  
1☒ diseases, investigating the causes of malnutrition and interventions, and adjusting  
2☒ dialysis regimens for haemodynamic stability. Second, the assessment using the  
21 combined categories of pre-HD SBP and PR offers the potential for stratification of  
22 high-risk patients that cannot be identified not only by the SBP or PR categories alone,  
2☒ but also by indices defined by RPP or SI alone. Specifically, patients with high SBP and  
2☒ high PR, low SBP and high PR, and high SBP and low PR were at higher risk than the



1 reference category. In contrast, a high RPP (i.e.  $SBP \times PR$ ) can only risk stratify those  
2 with high SBP and PR, whereas a high SI (i.e.  $PR/SBP$ ) can only risk stratify those with  
☒ low SBP and high PR. In addition, the combination of SBP and PR is more convenient  
☒ in clinical practice than calculating the RPP and SI. Indeed, the heatmaps successfully  
☒ visualised the degree of risk in a semiquantitative manner.<sup>25</sup> Therefore, our findings will  
☒ serve as a useful reference for the preparation of blood pressure guidelines for patients  
☒ on maintenance HD and will be a user-friendly resource for general dialysis  
☒ practitioners.

☒ This study had several limitations. First, as in international cohort studies, such  
1☒ as the Dialysis Outcomes and Practice Patterns Study (DOPPS), the SBP and PR  
11 measurements captured in the JSDT are not standardised. However, in the JSDT, SBP  
12 and PR are usually measured in the supine position while lying in bed during  
1☒ preparation for HD sessions.<sup>6</sup> Second, several unmeasured factors, such as underlying  
1☒ structural heart disease, serum potassium level, and drugs with negative inotropic or  
1☒ chronotropic effects, may have influenced the relationship between pre-HD SBP, PR,  
1☒ and outcomes. Third, the follow-up period of 1 year in this study may not have been  
1☒ long enough to examine the impact of SBP and PR on mortality from atherosclerotic  
1☒ heart disease.

1☒ In conclusion, among patients on maintenance dialysis, the combined pre-HD  
2☒ SBP and PR categories were shown to identify excess risk groups for one-year all-cause  
21 and cardiac mortalities more effectively than either category alone. Longitudinal studies  
22 with longer follow-up periods are needed to examine the long-term effects of the  
2☒ combination of SBP and PR.

2☒

1 **Funding**

2 None

**Acknowledgements:**

We acknowledge the efforts of the members of the Subcommittee for JRDR Regional

Cooperation and staff members of the dialysis facilities who participated in the survey

and responded to the questionnaires.

**Disclosure of interest**

1 TT received consulting fees from Astellas Pharma Inc., and payments and educational

11 events from Torii Pharmaceutical Co., Ltd., Ono Pharmaceutical Co., Ltd., Kyowa Kirin

12 Co., Ltd., AstraZeneca K.K., and Nobelpharma Co., Ltd. RI received payments for

1 speaking from Astellas Pharma, Inc., Novartis Pharma K.K., and Otsuka

1 Pharmaceuticals. MA has received payment for speaking from Novartis Pharma K.K.,

1 Otsuka Pharmaceutical. NK received consulting fees from GlaxoSmithKline K.K. and

1 payments for speaking and educational events from Eisai Co., Ltd., Taisho

1 Pharmaceutical Co., Ltd., Kyowa Kirin Co., Ltd., GlaxoSmithKline K.K., Takeda

1 Pharmaceutical Co., Ltd., Kissei Pharmaceutical Co., Ltd., and Baxter Corporation.

1

2 **Data availability statement**

21 Data will be available immediately after publication with no end dates. Data will be

22 shared upon reasonable request to the corresponding author with permission from the

2 JRDR investigators. Restrictions apply to the availability of the data analysed in this

2 study to preserve patient confidentiality.

1 **Prior presentation**

2 Presented in part at the 69th Annual Meeting of the Japanese Society for Dialysis

☒ Therapy; 8 June 2024; Yokohama.

☒

☒ **Reference**

☒ 1. Kurita N, Akizawa T, Fukuhara S. Vitality Measured as Self-reported Energy

☒ Level and Clinical Outcomes in Hemodialysis Patients: The Japanese Dialysis

☒ Outcomes and Practice Pattern Study (J-DOPPS). *Am J Kidney Dis* 2019;73:486–495.

☒ doi: <https://doi.org/10.1053/j.ajkd.2018.10.001>

1☒ 2. Hannedouche T, Roth H, Krummel T, London GM, Jean G, Bouchet JL, et al.

11 Multiphasic Effects of Blood Pressure on Survival in Hemodialysis Patients. *Kidney Int*

12 2016;90:674–684. doi: <https://doi.org/10.1016/j.kint.2016.05.025>

1☒ 3. Zager PG, Nikolic J, Brown RH, Campbell MA, Hunt WC, Peterson D, et al. “U”

1☒ Curve Association of Blood Pressure and Mortality in Hemodialysis Patients. Medical

1☒ Directors of Dialysis Clinic, Inc. *Kidney Int* 1998;54:561–569. doi:

1☒ <https://doi.org/10.1046/j.1523-1755.1998.00005.x>

1☒ 4. Robinson BM, Tong L, Zhang J, Wolfe RA, Goodkin DA, Greenwood RN, et al.

1☒ Blood Pressure Levels and Mortality Risk Among Hemodialysis Patients in the Dialysis

1☒ Outcomes and Practice Patterns Study. *Kidney Int* 2012;82: 570–580. doi:

2☒ <https://doi.org/10.1038/ki.2012.136>

21 5. Inoue T, Tokuyama K, Yoshi S, Nagayoshi N, Iseki C, Iseki K. Elevated Resting

- 1 Heart Rate is an Independent Predictor of All-cause Death and Cardiovascular Events in  
2 Japanese Ambulatory Hemodialysis Patients. *Clin Exp Nephrol* 2012;16:938–944. doi:  
☒ <https://doi.org/10.1007/s10157-012-0641-3>
- ☒ 6. Iseki K, Nakai S, Yamagata K, Tsubakihara Y; Committee of Renal Data  
☒ Registry of the Japanese Society for Dialysis Therapy. Tachycardia as a Predictor of  
☒ Poor Survival in Chronic Haemodialysis Patients. *Nephrol Dial Transplant* 2011;26:  
☒ 963–969. doi: <https://doi.org/10.1093/ndt/gfq507>
- ☒ 7. Jiang X, Li X, Peng H, Li M, Wang C. Prognostic Value of Nighttime Double  
☒ Product in Nondialysis Chronic Kidney Disease With Hypertension. *J Am Heart Assoc*  
1☒ 2023;12: e031627. doi: <https://doi.org/10.1161/jaha.123.031627>
- 11 8. Inoue R, Ohkubo T, Kikuya M, Metoki H, Asayama K, Kanno A, et al.  
12 Predictive Value for Mortality of the Double Product at Rest Obtained by Home Blood  
1☒ Pressure Measurement: The Ohasama Study. *Am J Hypertens* 2012;25:568–575. doi:  
1☒ <https://doi.org/10.1038/ajh.2012.3>
- 1☒ 9. Jiang ZH, Aierken A, Wu TT, Zheng YY, Ma YT, Xie X. Rate Pressure Product  
1☒ as a Novel Predictor of Long-term Adverse Outcomes in Patients After Percutaneous  
1☒ Coronary Intervention: A Retrospective Cohort Study. *BMJ Open* 2023;13:e067951.  
1☒ doi: <https://doi.org/10.1136/bmjopen-2022-067951>
- 1☒ 10. Stoschitzky K. Blood Pressure, Heart Rate, or the Rate Pressure Product: What  
2☒ is the Best Predictor of Clinical Outcome? *Eur Heart J Open* 2022;2:oeac063. doi:  
21 <https://doi.org/10.1093/ehjopen/oeac063>
- 22 11. van Vliet BN, Montani JP. Baroreflex Stabilization of the Double Product. *Am J*

- 1 *Physiol* 1999;277:H1679–1689. doi: <https://doi.org/10.1152/ajpheart.1999.277.5.h1679>
- 2 12. Huang B, Yang Y, Zhu J, Liang Y, Tan H, Yu L, et al. Usefulness of the  
☒ Admission Shock Index for Predicting Short-term Outcomes in Patients With ST-  
☒ segment Elevation Myocardial Infarction. *Am J Cardiol* 2014;114:1315–1321. doi:  
☒ <https://doi.org/10.1016/j.amjcard.2014.07.062>
- ☒ 13. El-Menyar A, Al Habib KF, Zubaid M, Alsheikh-Ali AA, Sulaiman K,  
☒ Almahmeed W, et al. Utility of Shock Index in 24,636 Patients Presenting With Acute  
☒ Coronary Syndrome. *Eur Heart J Acute Cardiovasc Care* 2020;9:546–556. doi:  
☒ <https://doi.org/10.1177/2048872619886307>
- 1☒ 14. de Mutsert R, de Jager DJ, Jager KJ, Zoccali C, Dekker FW. Interaction on an  
11 Additive Scale. *Nephron Clin Pract* 2011;119:c154–157. doi:  
12 <https://doi.org/10.1159/000327596>
- 1☒ 15. de Jager DJ, de Mutsert R, Jager KJ, Zoccali C, Dekker FW. Reporting of  
1☒ Interaction. *Nephron Clin Pract* 2011;119:c158–161. doi:  
1☒ <https://doi.org/10.1159/000327598>
- 1☒ 16. Nitta K, Goto S, Masakane I, Hanafusa N, Taniguchi M, Hasegawa T, et al.  
1☒ Annual Dialysis Data Report for 2018, JSDT Renal Data Registry: Survey Methods,  
1☒ Facility Data, Incidence, Prevalence, and Mortality. *Ren Replace Ther* 2020;6:1–18.  
1☒ doi: <https://doi.org/10.1186/s41100-020-00286-9>
- 2☒ 17. Nitta K, Masakane I, Hanafusa N, Hoshino J, Taniguchi M, Joki N, et al. 2019  
21 Annual Dialysis Data Report, JSDT Renal Data Registry. *J Jpn Soc Dial Ther* 2020;53:  
22 579–632 (In Japanese except for abstract). doi: <https://doi.org/10.4009/jsdt.53.579>

- 1 18. Hanafusa N, Abe M, Joki N, Hoshino J, Kikuchi K, Goto S, et al. 2020 Annual  
2 Dialysis Data Report, JSDT Renal Data Registry. *J Jpn Soc Dial Ther* 2021;54:611–657  
☒ 579–632 (In Japanese except for abstract). doi: <https://doi.org/10.4009/jsdt.54.611>
- ☒ 19. Murakami M, Fujii N, Kanda E, Kikuchi K, Wada A, Hamano T, et al.  
☒ Association of Four Types of Vascular Access Including Arterial Superficialization  
☒ with Mortality in Maintenance Hemodialysis Patients: A Nationwide Cohort Study in  
☒ Japan. *Am J Nephrol* 2023;54:83–94. doi: <https://doi.org/10.1159/000529991>
- ☒ 20. Wakasugi M, Kazama JJ, Wada A, Hamano T, Masakane I, Narita I. Functional  
☒ Impairment Attenuates the Association Between High Serum Phosphate and Mortality  
1☒ in Dialysis Patients: A Nationwide Cohort Study. *Nephrol Dial Transplant*  
11 2019;34:1207–1216. doi: <https://doi.org/10.1093/ndt/gfy253>
- 12 21. Textor J, Hardt J, Knüppel S. DAGitty: A Graphical Tool for Analyzing Causal  
1☒ Diagrams. *Epidemiology* 2011;22:745. doi:  
1☒ <https://doi.org/10.1097/ede.0b013e318225c2be>
- 1☒ 22. Etminan M, Collins GS, Mansournia MA. Using Causal Diagrams to Improve  
1☒ the Design and Interpretation of Medical Research. *Chest* 2020;158:S21–S28. doi:  
1☒ <https://doi.org/10.1016/j.chest.2020.03.011>
- 1☒ 23. Greenland S. Tests for Interaction in Epidemiologic Studies: A Review and a  
1☒ Study of Power. *Stat Med* 1983;2:243–251. doi:  
2☒ <https://doi.org/10.1002/sim.4780020219>
- 21 24. Andersson T, Alfredsson L, Källberg H, Zdravkovic S, Ahlbom A. Calculating  
22 Measures of Biological Interaction. *Eur J Epidemiol* 2005;20:575–579. doi:

- 1 <https://doi.org/10.1007/s10654-005-7835-x>
- 2 25. Ohannessian R, Bénet T, Argaud L, Guérin C, Guichon C, Piriou V, et al.  
☒ Heatmap for Data Visualization in Infection Control Epidemiology: An Application  
☒ Describing the Relationship Between Hospital-acquired Infections, Simplified Acute  
☒ Physiological Score II, and Length of Stay in Adult Intensive Care Units. *Am J Infect*  
☒ *Control* 2017;45:746–749. doi: <https://doi.org/10.1016/j.ajic.2017.02.012>
- ☒ 26. Jann B. Color Palettes for Stata Graphics. *Stata J* 2018;18:765–785. doi:  
☒ <https://doi.org/10.1177/1536867X1801800402>
- ☒ 27. Rubin DB, Schenker N. Multiple Imputation in Health-care Databases: An  
1☒ Overview and Some Applications. *Stat Med* 1991;10:585–598. doi:  
11 <https://doi.org/10.1002/sim.4780100410>
- 12 28. Turner JM, Peixoto AJ. Blood Pressure Targets for Hemodialysis Patients.  
1☒ *Kidney Int* 2017;92:816–823. doi: <https://doi.org/10.1016/j.kint.2017.01.038>
- 1☒ 29. Loutradis C, Sarafidis PA, Ferro CJ, Zoccali C. Volume Overload in  
1☒ Hemodialysis: Diagnosis, Cardiovascular Consequences, and Management. *Nephrol*  
1☒ *Dial Transplant* 2021;36:2182–2193. doi: <https://doi.org/10.1093/ndt/gfaa182>
- 1☒ 30. Nixon JV, Mitchell JH, McPhaul JJ Jr, Henrich WL. Effect of Hemodialysis on  
1☒ Left Ventricular Function. Dissociation of Changes in Filling Volume and in Contractile  
1☒ State. *J Clin Invest* 1983;71:377–384. doi: <https://doi.org/10.1172/jci110779>
- 2☒ 31. Port FK, Hulbert-Shearon TE, Wolfe RA, Bloembergen WE, Golper TA,  
21 Agodoa LY, et al. Predialysis Blood Pressure and Mortality Risk in a National Sample

- 1 of Maintenance Hemodialysis Patients. *Am J Kidney Dis* 1999;33:507–517. doi:  
2 [https://doi.org/10.1016/s0272-6386\(99\)70188-5](https://doi.org/10.1016/s0272-6386(99)70188-5)
32. Palmer BF. Why are Some Dialysis Patients Chronically Hypotensive in the  
 Absence of Heart Disease and Volume Depletion? *Semin Dial* 2011;24:404–405. doi:  
 <https://doi.org/10.1111/j.1525-139x.2011.00915.x>
33. Bajpai D, Puttarajappa CM. Chronic Hypotension and Transplant Outcomes—the  
 Known Unknowns. *Kidney Int Rep* 2024;9:1571–1573. doi:  
 <https://doi.org/10.1016/j.ekir.2024.04.065>
34. Agarwal R, Sinha AD, Pappas MK, Abraham TN, Tegegne GG. Hypertension in  
1  Hemodialysis Patients Treated With Atenolol or Lisinopril: A Randomized Controlled  
11 Trial. *Nephrol Dial Transplant* 2014;29:672–681. doi:  
12 <https://doi.org/10.1093/ndt/gft515>
- 1  35. de Mutsert R, Grootendorst DC, Axelsson J, Boeschoten EW, Krediet RT,  
1  Dekker FW, et al. Excess Mortality due to Interaction Between Protein-Energy Wasting,  
1  Inflammation and Cardiovascular Disease in Chronic Dialysis Patients. *Nephrol Dial  
1  Transplant* 2008;23:2957–2964. doi: <https://doi.org/10.1093/ndt/gfn167>
- 1  36. VanderWeele TJ. The Interaction Continuum. *Epidemiology* 2019;30:648–658.  
1  doi: <https://doi.org/10.1097/ede.0000000000001054>
- 1   
2



1 **Figure legends**

2 **Figure 1. Heatmap showing the association between the combination of pre-**

3 **haemodialysis systolic blood pressure and pulse rate and all-cause mortality**

4 A. Hazard ratios; B. Relative excess risks due to interaction

5 Hazard ratios and relative excess risks owing to interactions are estimated using the

6 same Cox proportional hazards model. Pre-haemodialysis systolic blood pressure of

7 140-<160 mmHg and a pulse rate of 60-<70 / min is the reference category. The data

8 are adjusted for age; sex; body mass index; serum C-reactive protein level; haemoglobin

9 level; smoking status; use of antihypertensive drugs; history of atrial fibrillation,

10 diabetes, ischaemic heart disease, cerebral infarction, and cerebral haemorrhage;

11 interdialytic weight gain; and diastolic blood pressure.

12 Each cell is coloured according to the numerical value of the point estimates. Numbers

13 in parenthesis indicate 95% confidence intervals.

14 HD, haemodialysis; N/A, not applicable

15 **Figure 2. Heatmap showing the association between the combination of pre-**

16 **haemodialysis systolic blood pressure and pulse rate and cardiac mortality**

17 A. Hazard ratios; B. Relative excess risks due to interaction

18 Hazard ratios and relative excess risks owing to interactions are estimated using the

19 same Cox proportional hazards model. Pre-haemodialysis systolic blood pressure of

20 140-<160 mmHg and a pulse rate of 60-<70 / min is the reference category. The data

21 are adjusted for age; sex; body mass index; serum C-reactive protein level; haemoglobin

22 level; smoking status; use of antihypertensive drugs; history of atrial fibrillation,

23 diabetes, ischaemic heart disease, cerebral infarction, and cerebral haemorrhage;

- 1 interdialytic weight gain; and diastolic blood pressure.
  - 2 Each cell is coloured according to the numerical value of the point estimates.
- Numbers in parenthesis indicate 95% confidence intervals.
-

**Table 1. Baseline characteristics of the overall patients and those categorised by the systolic blood pressure**

| Variable                        | Overall<br>N = 275,215 | Systolic blood pressure, mmHg |                        |                        |                        |                        |                     |
|---------------------------------|------------------------|-------------------------------|------------------------|------------------------|------------------------|------------------------|---------------------|
|                                 |                        | <100<br>n = 4,304             | 100-<120<br>n = 19,773 | 120-<140<br>n = 60,046 | 140-<160<br>n = 91,112 | 160-<180<br>n = 65,955 | ≥180<br>n = 34,025  |
| Age (years)                     | 70.0<br>(61.0,78.0)    | 72.0<br>(64.0,81.0)           | 73.0<br>(64.0,81.0)    | 71.0<br>(63.0,79.0)    | 71.0<br>(62.0,78.0)    | 70.0<br>(61.0,77.0)    | 69.0<br>(58.0,76.0) |
| missing                         | 0                      | 0                             | 0                      | 0                      | 0                      | 0                      | 0                   |
| Men                             | 65.8                   | 55.7                          | 61.1                   | 64.8                   | 66.7                   | 67.4                   | 66.2                |
| missing                         | 0                      | 0                             | 0                      | 0                      | 0                      | 0                      | 0                   |
| Dialysis vintage (years)        | 5.0 (2.0,10.0)         | 7.0 (2.0,16.0)                | 5.0 (2.0,13.0)         | 5.0 (2.0,11.0)         | 5.0 (2.0,10.0)         | 5.0 (2.0,10.0)         | 5.0 (2.0,9.0)       |
| missing                         | 160                    | 6                             | 12                     | 46                     | 43                     | 35                     | 18                  |
| Renal disease                   |                        |                               |                        |                        |                        |                        |                     |
| Diabetic nephropathy            | 42.3                   | 25.6                          | 29.2                   | 33.9                   | 40.3                   | 48.4                   | 59.7                |
| Chronic glomerulo-<br>nephritis | 25.4                   | 34.5                          | 30.7                   | 29.1                   | 26.5                   | 22.8                   | 17.3                |
| Nephrosclerosis                 | 13                     | 14.9                          | 15.6                   | 14.7                   | 13.3                   | 12                     | 9.8                 |
| Polycystic kidney<br>disease    | 3.9                    | 4.1                           | 5.2                    | 5                      | 4.1                    | 3.1                    | 1.9                 |
| RPGN                            | 0.8                    | 1.1                           | 1.1                    | 1                      | 0.8                    | 0.6                    | 0.4                 |
| Unknown                         | 14.6                   | 19.8                          | 18.1                   | 16.3                   | 15                     | 13.1                   | 10.9                |
| missing                         | 30,418                 | 644                           | 2,579                  | 7,298                  | 10,224                 | 6,612                  | 3,061               |
| Modality                        |                        |                               |                        |                        |                        |                        |                     |
| HD                              | 55.4                   | 57.4                          | 56.7                   | 55.8                   | 55.8                   | 54.9                   | 53.4                |
| HDF                             | 44.6                   | 42.6                          | 43.3                   | 44.2                   | 44.2                   | 45.1                   | 46.6                |
| missing                         | 0                      | 0                             | 0                      | 0                      | 0                      | 0                      | 0                   |
| Diabetes                        | 54.2                   | 38.4                          | 42.1                   | 45.8                   | 52.2                   | 60.1                   | 70.8                |
| missing                         | 23,808                 | 458                           | 2,058                  | 5,734                  | 8,015                  | 5,288                  | 2,255               |
| Current smoking                 | 10.8                   | 6.7                           | 7.3                    | 8.7                    | 10.5                   | 12.5                   | 14.6                |
| missing                         | 53,646                 | 827                           | 3,924                  | 11,465                 | 17,611                 | 12,950                 | 6,869               |
| Use of<br>antihypertensives     | 66.7                   | 28.1                          | 44.3                   | 60                     | 69.3                   | 73.4                   | 75.8                |

|                         |         |                  |                  |                  |                  |                  |                  |                  |
|-------------------------|---------|------------------|------------------|------------------|------------------|------------------|------------------|------------------|
|                         | missing | 31,612           | 575              | 2,406            | 6,721            | 10,266           | 7,644            | 4,000            |
| Atrial fibrillation     |         | 7.7              | 21.4             | 14.7             | 9.7              | 7                | 5.6              | 4.6              |
|                         | missing | 46,510           | 799              | 3,416            | 9,960            | 15,201           | 11,233           | 5,901            |
| Ischaemic heart disease |         | 26.7             | 35.8             | 30.4             | 27.2             | 25.4             | 26.2             | 26.6             |
|                         | missing | 39,556           | 587              | 2,799            | 8,252            | 13,016           | 9,717            | 5,185            |
| Cerebral haemorrhage    |         | 6.5              | 7.4              | 7.4              | 6.9              | 6.4              | 6.2              | 6                |
|                         | missing | 43,436           | 675              | 3,139            | 9,096            | 14,183           | 10,633           | 5,710            |
| Cerebral infarction     |         | 18.2             | 19.6             | 19.7             | 18.1             | 17.5             | 18.2             | 19.1             |
|                         | missing | 40,592           | 635              | 2,898            | 8,495            | 13,300           | 9,971            | 5,293            |
| Pre-dialysis HR         |         | 73 (65,82)       | 74 (65,84)       | 72 (64,82)       | 72 (64,80)       | 73 (65,81)       | 75 (66,83)       | 77 (68,86)       |
|                         | missing | 0                | 0                | 0                | 0                | 0                | 0                | 0                |
| Pre-dialysis SBP        |         | 151 (135,167)    | N/A              | N/A              | N/A              | N/A              | N/A              | N/A              |
|                         | missing | 0                |                  |                  |                  |                  |                  |                  |
| Pre-dialysis DBP        |         | 78 (68, 87)      | 53 (47, 59)      | 63 (56, 69)      | 70 (64, 78)      | 77 (70, 85)      | 84 (76, 92)      | 93 (84, 102)     |
|                         | missing | 194              | 40               | 27               | 46               | 35               | 11               | 35               |
| BMI                     |         | 22.4 (20.0,25.2) | 21.2 (18.6,24.0) | 21.7 (19.4,24.5) | 22.0 (19.8,24.7) | 22.3 (20.0,25.1) | 22.6 (20.3,25.6) | 23.1 (20.5,26.2) |
|                         | missing | 17,879           | 324              | 1,417            | 3,902            | 5,864            | 4,235            | 2,137            |
| UF (L)                  |         | 2.4 (1.8, 3.0)   | 2.0 (1.3, 2.6)   | 2.2 (1.5, 2.8)   | 2.3 (1.7, 2.9)   | 2.4 (1.8, 3.0)   | 2.5 (1.9, 3.1)   | 2.6 (2.0, 3.4)   |
|                         | missing | 2232             | 78               | 201              | 517              | 697              | 522              | 217              |
| UFR(L/hr)               |         | 0.60 (0.45,0.75) | 0.48 (0.32,0.63) | 0.54 (0.40,0.68) | 0.57 (0.43,0.73) | 0.60 (0.46,0.75) | 0.63 (0.47,0.77) | 0.65 (0.50,0.82) |
|                         | missing | 3,313            | 81               | 272              | 769              | 1,044            | 784              | 363              |
| Dialysis time (min)     |         | 240 (240,240)    | 240 (240,240)    | 240 (240,240)    | 240 (240,240)    | 240 (240,240)    | 240 (240,240)    | 240 (240,244)    |
|                         | missing | 1,435            | 21               | 102              | 325              | 463              | 346              | 178              |
| Hb (g/dL)               |         | 11.0 (10.2,11.7) | 10.9 (9.9,11.7)  | 10.9 (10.1,11.7) | 11.0 (10.2,11.7) | 11.0 (10.2,11.7) | 11.0 (10.3,11.7) | 11.0 (10.3,11.7) |
|                         | missing | 3,818            | 83               | 290              | 866              | 1,149            | 935              | 495              |
| CRP (mg/dL)             |         | 0.15 (0.06,0.46) | 0.33 (0.10,1.15) | 0.21 (0.08,0.70) | 0.16 (0.06,0.50) | 0.14 (0.06,0.43) | 0.14 (0.06,0.41) | 0.15 (0.06,0.42) |

missing 36,306 515 2,530 7,726 11,946 8,992 4,597

1 Data are presented as medians (interquartile range) for continuous measures and as percentages for categorical measures. RPGN, rapidly progressive  
2 glomerulonephritis; HD, haemodialysis; HDF, haemodiafiltration; PR, pulse rate; SBP, systolic blood pressure; DBP, diastolic blood pressure; BMI, body mass  
index; UFR, ultrafiltration rate; Hb, haemoglobin; CRP, C-reactive protein; N/A, not applicable; HR, hazard ratio

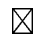

**Table 2. Baseline characteristics of the overall patients and those categorised by the pulse rate**

| Variable                        | Overall<br>N = 275,215 | Pulse rate, per minute |                      |                      |                      |                      |                       |                       |                     |
|---------------------------------|------------------------|------------------------|----------------------|----------------------|----------------------|----------------------|-----------------------|-----------------------|---------------------|
|                                 |                        | <50<br>n = 3,419       | 50-<60<br>n = 25,396 | 60-<70<br>n = 73,511 | 70-<80<br>n = 84,845 | 80-<90<br>n = 55,096 | 90-<100<br>n = 23,613 | 100-<110<br>n = 7,059 | ≥110<br>n = 2,276   |
| Age (years)                     | 70.0<br>(61.0,78.0)    | 77.0<br>(71.0,83.0)    | 75.0<br>(68.0,81.0)  | 72.0<br>(66.0,80.0)  | 70.0<br>(61.0,78.0)  | 68.0<br>(57.0,76.0)  | 65.0<br>(54.0,74.0)   | 64.0<br>(52.0,73.0)   | 67.0<br>(55.0,75.0) |
| missing                         | 0                      | 0                      | 0                    | 0                    | 0                    | 0                    | 0                     | 0                     | 0                   |
| Men                             | 65.8                   | 75.1                   | 71.5                 | 66                   | 63.6                 | 64.8                 | 67                    | 68.5                  | 68.1                |
| missing                         | 0                      | 0                      | 0                    | 0                    | 0                    | 0                    | 0                     | 0                     | 0                   |
| Dialysis vintage (years)        | 5.0 (2.0,10.0)         | 4.0 (1.0,9.0)          | 5.0 (2.0,10.0)       | 5.0 (2.0,11.0)       | 5.0 (2.0,11.0)       | 5.0 (2.0,10.0)       | 5.0 (2.0,10.0)        | 5.0 (2.0,10.0)        | 5.0 (2.0,11.0)      |
| missing                         | 160                    | 5                      | 18                   | 44                   | 40                   | 26                   | 18                    | 7                     | 2                   |
| Renal disease                   |                        |                        |                      |                      |                      |                      |                       |                       |                     |
| Diabetic nephropathy            | 42.3                   | 40                     | 35.3                 | 37.8                 | 42.3                 | 47.4                 | 50.2                  | 49.6                  | 44.3                |
| Chronic glomerulo-<br>nephritis | 25.4                   | 24.2                   | 28.2                 | 27.6                 | 25.7                 | 23.1                 | 21.6                  | 21.6                  | 24.1                |
| Nephrosclerosis                 | 13                     | 18.8                   | 17.9                 | 15                   | 12.3                 | 10.8                 | 9.7                   | 10.3                  | 11.5                |
| Polycystic kidney<br>disease    | 3.9                    | 3.5                    | 4.2                  | 4.3                  | 4                    | 3.4                  | 3.1                   | 2.9                   | 3.2                 |
| RPGN                            | 0.8                    | 0.5                    | 0.7                  | 0.7                  | 0.8                  | 0.8                  | 0.8                   | 0.7                   | 0.9                 |
| Unknown                         | 14.6                   | 13.1                   | 13.7                 | 14.6                 | 14.9                 | 14.5                 | 14.5                  | 14.9                  | 16                  |
| missing                         | 30,418                 | 446                    | 3,022                | 8,449                | 9,314                | 5,706                | 2,487                 | 737                   | 257                 |
| Modality                        |                        |                        |                      |                      |                      |                      |                       |                       |                     |
| HD                              | 55.4                   | 60.7                   | 58.8                 | 57.1                 | 55                   | 53.3                 | 52.8                  | 52                    | 55.3                |
| HDF                             | 44.6                   | 39.3                   | 41.2                 | 42.9                 | 45                   | 46.7                 | 47.2                  | 48                    | 44.7                |
| missing                         | 0                      | 0                      | 0                    | 0                    | 0                    | 0                    | 0                     | 0                     | 0                   |
| Diabetes                        | 54.2                   | 52.8                   | 48                   | 50.1                 | 53.9                 | 58.8                 | 61.2                  | 61                    | 55.8                |
| missing                         | 23,808                 | 357                    | 2,334                | 6,859                | 7,298                | 4,374                | 1,864                 | 546                   | 176                 |
| Current smoking                 | 10.8                   | 7.2                    | 7.4                  | 8.9                  | 10.7                 | 13                   | 15                    | 15.1                  | 13                  |
| missing                         | 53,646                 | 724                    | 4,978                | 14,341               | 16,553               | 10,607               | 4,598                 | 1,359                 | 486                 |
| Use of<br>antihypertensives     | 66.7                   | 65.8                   | 69.6                 | 68.3                 | 66.9                 | 65.6                 | 63.2                  | 60.1                  | 54.4                |
| missing                         | 31,612                 | 421                    | 2,804                | 8,417                | 9,735                | 6,374                | 2,690                 | 853                   | 318                 |

⊠

|                         |                     |                     |                     |                     |                     |                     |                     |                     |                     |
|-------------------------|---------------------|---------------------|---------------------|---------------------|---------------------|---------------------|---------------------|---------------------|---------------------|
| Atrial fibrillation     | 7.7                 | 15.1                | 8.5                 | 7.1                 | 6.7                 | 7.4                 | 9.2                 | 13                  | 24                  |
| missing                 | 46,510              | 618                 | 4,257               | 12,408              | 14,319              | 9,345               | 3,975               | 1,188               | 400                 |
| Ischaemic heart disease | 26.7                | 32.9                | 29.8                | 27.4                | 25.9                | 25.6                | 25.4                | 26                  | 29.3                |
| missing                 | 39,556              | 522                 | 3,542               | 10,728              | 12,135              | 7,885               | 3,413               | 990                 | 341                 |
| Cerebral haemorrhage    | 6.5                 | 7.5                 | 7.3                 | 7                   | 6.4                 | 6.2                 | 5.6                 | 5.6                 | 5.8                 |
| missing                 | 43,436              | 601                 | 3,940               | 11,778              | 13,323              | 8,608               | 3,704               | 1,096               | 386                 |
| Cerebral infarction     | 18.2                | 21                  | 20.5                | 19                  | 17.7                | 17.4                | 16.8                | 16.5                | 19.1                |
| missing                 | 40,592              | 549                 | 3,620               | 10,998              | 12,490              | 8,055               | 3,501               | 1,032               | 347                 |
| Pre-dialysis HR         | 73 (65,82)          | N/A                 | N/A                 | N/A                 | N/A                 | N/A                 | N/A                 | N/A                 | N/A                 |
| missing                 | 0                   |                     |                     |                     |                     |                     |                     |                     |                     |
| Pre-dialysis SBP        | 151<br>(135,167)    | 144<br>(128,160)    | 147<br>(132,162)    | 149<br>(134,164)    | 151<br>(136,167)    | 154<br>(138,170)    | 156<br>(138,173)    | 155<br>(137,173)    | 149<br>(128,168)    |
| missing                 | 0                   | 0                   | 0                   | 0                   | 0                   | 0                   | 0                   | 0                   | 0                   |
| Pre-dialysis DBP        | 78 (68, 87)         | 64 (57, 73)         | 70 (62, 78)         | 74 (66, 83)         | 78 (70, 87)         | 82 (73, 91)         | 85 (75, 95)         | 86 (75, 97)         | 86 (74, 97)         |
| missing                 | 194                 | 7                   | 24                  | 36                  | 53                  | 37                  | 18                  | 11                  | 8                   |
| BMI                     | 22.4<br>(20.0,25.2) | 21.4<br>(19.3,23.6) | 21.5<br>(19.4,23.9) | 21.9<br>(19.7,24.4) | 22.4<br>(20.0,25.2) | 23.0<br>(20.4,26.0) | 23.5<br>(20.8,26.9) | 23.8<br>(21.0,27.4) | 23.2<br>(20.4,26.6) |
| missing                 | 17,879              | 255                 | 1,665               | 4,665               | 5,394               | 3,657               | 1,613               | 470                 | 160                 |
| UF (L)                  | 2.4 (1.8, 3.0)      | 2.3 (1.8, 2.9)      | 2.3 (1.8, 2.9)      | 2.4 (1.8, 2.9)      | 2.4 (1.8, 3.0)      | 2.5 (1.8, 3.2)      | 2.6 (1.9, 3.3)      | 2.6 (1.8, 3.4)      | 2.4 (1.7, 3.2)      |
| missing                 | 2232                | 27                  | 207                 | 564                 | 671                 | 453                 | 200                 | 68                  | 42                  |
| UFR (L/hr)              | 0.60<br>(0.45,0.75) | 0.60<br>(0.46,0.73) | 0.60<br>(0.45,0.73) | 0.60<br>(0.45,0.73) | 0.60<br>(0.45,0.75) | 0.62<br>(0.46,0.77) | 0.63<br>(0.47,0.80) | 0.63<br>(0.46,0.82) | 0.60<br>(0.43,0.77) |
| missing                 | 3,313               | 35                  | 296                 | 880                 | 1,002               | 662                 | 299                 | 93                  | 46                  |
| Dialysis time (min)     | 240<br>(240,240)    | 240<br>(240,240)    | 240<br>(240,240)    | 240<br>(240,240)    | 240<br>(240,240)    | 240<br>(240,243)    | 240<br>(240,244)    | 240<br>(240,245)    | 240<br>(240,245)    |
| missing                 | 1,435               | 14                  | 127                 | 374                 | 450                 | 289                 | 135                 | 38                  | 8                   |
| Hb (g/dL)               | 11.0<br>(10.2,11.7) | 11.0<br>(10.2,11.7) | 11.0<br>(10.3,11.7) | 11.0<br>(10.2,11.7) | 11.0<br>(10.2,11.7) | 11.0<br>(10.2,11.7) | 11.0<br>(10.2,11.7) | 10.9<br>(10.1,11.8) | 10.9<br>(10.0,11.8) |
| missing                 | 3,818               | 44                  | 315                 | 979                 | 1,145               | 794                 | 368                 | 130                 | 43                  |
| CRP (mg/dL)             | 0.15<br>(0.06,0.46) | 0.15<br>(0.06,0.43) | 0.12<br>(0.05,0.36) | 0.13<br>(0.05,0.39) | 0.14<br>(0.06,0.43) | 0.17<br>(0.07,0.52) | 0.21<br>(0.08,0.67) | 0.27<br>(0.10,0.85) | 0.32<br>(0.11,1.03) |
| missing                 | 36,306              | 414                 | 3,310               | 9,769               | 11,383              | 7,080               | 3,180               | 887                 | 283                 |

⊠

1 Data are presented as medians (interquartile range) for continuous measures and as percentages for categorical measures. RPGN, rapidly progressive  
2 glomerulonephritis; HD, haemodialysis; HDF, haemodiafiltration; PR, pulse rate; SBP, systolic blood pressure; DBP, diastolic blood pressure; BMI, body mass  
3 index; UFR, ultrafiltration rate; Hb, haemoglobin; CRP, C-reactive protein; N/A, not applicable; HR, hazard ratio

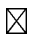



## A. Hazard ratio (HR)

pre-HD pulse rate, per min

### pre-HD systolic blood pressure, mmHg

|             | < 100             | 100 - < 120       | 120 - < 140       | 140 - < 160       | 160 - < 180       | ≥ 180              |
|-------------|-------------------|-------------------|-------------------|-------------------|-------------------|--------------------|
| < 50        | 1.89 (1.25, 2.85) | 1.40 (1.09, 1.79) | 1.03 (0.84, 1.26) | 1.04 (0.86, 1.27) | 1.24 (0.97, 1.57) | 1.66 (1.22, 2.25)  |
| 50 - < 60   | 2.26 (1.85, 2.76) | 1.18 (1.04, 1.34) | 1.02 (0.93, 1.12) | 1.01 (0.92, 1.10) | 1.15 (1.04, 1.27) | 1.16 (1.002, 1.35) |
| 60 - < 70   | 1.92 (1.66, 2.22) | 1.55 (1.42, 1.69) | 1.06 (0.99, 1.14) | Ref.              | 1.09 (1.01, 1.17) | 1.28 (1.17, 1.41)  |
| 70 - < 80   | 2.74 (2.41, 3.11) | 1.65 (1.51, 1.80) | 1.31 (1.22, 1.4)  | 1.12 (1.05, 1.19) | 1.16 (1.08, 1.25) | 1.24 (1.13, 1.35)  |
| 80 - < 90   | 2.97 (2.60, 3.41) | 2.33 (2.13, 2.56) | 1.65 (1.53, 1.78) | 1.36 (1.26, 1.46) | 1.31 (1.21, 1.41) | 1.36 (1.23, 1.50)  |
| 90 - < 100  | 3.50 (2.92, 4.20) | 2.68 (2.38, 3.01) | 1.85 (1.68, 2.04) | 1.65 (1.51, 1.81) | 1.42 (1.27, 1.58) | 1.36 (1.19, 1.56)  |
| 100 - < 110 | 4.10 (3.20, 5.23) | 3.04 (2.55, 3.63) | 2.41 (2.08, 2.79) | 1.57 (1.36, 1.82) | 1.76 (1.48, 2.09) | 1.80 (1.46, 2.23)  |
| ≥ 110       | 4.93 (3.63, 6.71) | 2.62 (2.07, 3.32) | 2.56 (2.08, 3.15) | 2.01 (1.61, 2.51) | 1.55 (1.14, 2.11) | 1.95 (1.36, 2.78)  |

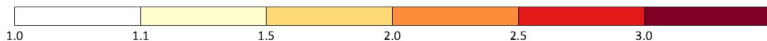

## B. Relative excess risk due to interaction (RERI)

pre-HD pulse rate, per min

### pre-HD systolic blood pressure, mmHg

|             | < 100               | 100 - < 120          | 120 - < 140         | 140 - < 160 | 160 - < 180           | ≥ 180                |
|-------------|---------------------|----------------------|---------------------|-------------|-----------------------|----------------------|
| < 50        | -0.07 (-0.91, 0.76) | -0.19 (-0.60, 0.22)  | -0.08 (-0.37, 0.22) | N/A         | 0.11 (-0.25, 0.47)    | 0.33 (-0.22, 0.88)   |
| 50 - < 60   | 0.33 (-0.17, 0.84)  | -0.38 (-0.58, -0.18) | -0.05 (-0.18, 0.09) | N/A         | 0.06 (-0.09, 0.20)    | -0.13 (-0.34, 0.09)  |
| 60 - < 70   | N/A                 | N/A                  | N/A                 | N/A         | N/A                   | N/A                  |
| 70 - < 80   | 0.70 (0.29, 1.11)   | -0.02 (-0.19, 0.16)  | 0.13 (0.02, 0.23)   | N/A         | -0.04 (-0.15, 0.07)   | -0.16 (-0.31, -0.01) |
| 80 - < 90   | 0.70 (0.25, 1.15)   | 0.43 (0.21, 0.65)    | 0.23 (0.10, 0.37)   | N/A         | -0.14 (-0.27, -0.002) | -0.28 (-0.45, -0.10) |
| 90 - < 100  | 0.93 (0.26, 1.60)   | 0.48 (0.15, 0.81)    | 0.13 (-0.08, 0.35)  | N/A         | -0.32 (-0.53, -0.12)  | -0.57 (-0.82, -0.33) |
| 100 - < 110 | 1.6 (0.57, 2.64)    | 0.92 (0.36, 1.49)    | 0.77 (0.37, 1.18)   | N/A         | 0.10 (-0.27, 0.47)    | -0.05 (-0.49, 0.39)  |
| ≥ 110       | 2.00 (0.43, 3.57)   | 0.06 (-0.69, 0.82)   | 0.49 (-0.19, 1.17)  | N/A         | -0.55 (-1.2, 0.10)    | -0.35 (-1.16, 0.47)  |

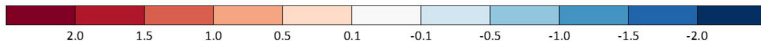

## A. Hazard ratio (HR)

pre-HD pulse rate, per min

### pre-HD systolic blood pressure, mmHg

|             | < 100             | 100 - < 120       | 120 - < 140       | 140 - < 160       | 160 - < 180        | ≥ 180             |
|-------------|-------------------|-------------------|-------------------|-------------------|--------------------|-------------------|
| < 50        | 3.35 (1.83, 6.13) | 1.80 (1.18, 2.75) | 0.98 (0.65, 1.47) | 1.24 (0.88, 1.76) | 1.74 (1.17, 2.59)  | 2.32 (1.41, 3.83) |
| 50 - < 60   | 3.22 (2.32, 4.47) | 1.42 (1.13, 1.79) | 1.09 (0.91, 1.30) | 1.10 (0.93, 1.30) | 1.06 (0.86, 1.30)  | 1.07 (0.79, 1.45) |
| 60 - < 70   | 2.32 (1.79, 3.00) | 1.89 (1.61, 2.21) | 1.11 (0.97, 1.27) | Ref.              | 1.15 (1.001, 1.32) | 1.26 (1.06, 1.51) |
| 70 - < 80   | 3.34 (2.66, 4.20) | 1.89 (1.61, 2.22) | 1.42 (1.25, 1.61) | 1.19 (1.06, 1.35) | 1.20 (1.04, 1.37)  | 1.24 (1.04, 1.46) |
| 80 - < 90   | 4.58 (3.67, 5.72) | 3.07 (2.61, 3.61) | 1.81 (1.57, 2.08) | 1.40 (1.22, 1.60) | 1.35 (1.16, 1.57)  | 1.50 (1.25, 1.80) |
| 90 - < 100  | 4.23 (3.07, 5.85) | 3.33 (2.71, 4.11) | 2.24 (1.87, 2.67) | 1.60 (1.34, 1.92) | 1.60 (1.31, 1.95)  | 1.38 (1.07, 1.78) |
| 100 - < 110 | 6.07 (4.07, 9.07) | 3.87 (2.84, 5.27) | 2.41 (1.81, 3.22) | 1.79 (1.36, 2.36) | 1.90 (1.38, 2.61)  | 2.00 (1.37, 2.92) |
| ≥ 110       | 5.60 (3.21, 9.77) | 3.52 (2.35, 5.29) | 3.17 (2.20, 4.57) | 2.90 (2.00, 4.20) | 2.28 (1.38, 3.77)  | 1.60 (0.75, 3.40) |



## B. Relative excess risk due to interaction (RERI)

pre-HD pulse rate, per min

### pre-HD systolic blood pressure, mmHg

|             | < 100              | 100 - < 120          | 120 - < 140         | 140 - < 160 | 160 - < 180         | ≥ 180               |
|-------------|--------------------|----------------------|---------------------|-------------|---------------------|---------------------|
| < 50        | 0.53 (-1.30, 2.36) | -0.31 (-1.15, 0.53)  | -0.35 (-0.93, 0.23) | N/A         | 0.34 (-0.47, 1.15)  | 0.90 (-0.42, 2.21)  |
| 50 - < 60   | 0.65 (-0.37, 1.67) | -0.51 (-0.92, -0.11) | -0.11 (-0.38, 0.15) | N/A         | -0.21 (-0.50, 0.09) | -0.33 (-0.77, 0.10) |
| 60 - < 70   | N/A                | N/A                  | N/A                 | N/A         | N/A                 | N/A                 |
| 70 - < 80   | 0.71 (-0.09, 1.50) | -0.20 (-0.55, 0.15)  | 0.10 (-0.10, 0.31)  | N/A         | -0.14 (-0.37, 0.08) | -0.21 (-0.53, 0.10) |
| 80 - < 90   | 1.73 (0.74, 2.72)  | 0.69 (0.23, 1.15)    | 0.28 (0.01, 0.55)   | N/A         | -0.18 (-0.45, 0.10) | -0.11 (-0.49, 0.27) |
| 90 - < 100  | 1.05 (-0.25, 2.34) | 0.76 (0.08, 1.44)    | 0.52 (0.07, 0.96)   | N/A         | -0.11 (-0.54, 0.31) | -0.45 (-0.96, 0.06) |
| 100 - < 110 | 2.59 (0.31, 4.86)  | 1.14 (-0.09, 2.38)   | 0.45 (-0.37, 1.27)  | N/A         | -0.01 (-0.82, 0.79) | 0.04 (-0.95, 1.02)  |
| ≥ 110       | 0.97 (-2.11, 4.05) | -0.41 (-2.17, 1.36)  | 0.04 (-1.54, 1.62)  | N/A         | -0.75 (-2.42, 0.92) | -1.64 (-3.41, 0.13) |



Source: https://medrxiv.org/content/10.1101/2024.06.30.24309750v1.full.pdf
